# Supplementary material
Source: Springer Nature journal article supplement (https://www.springermedizin.de/resource/supplementary/13041_2012_174_MOESM2_ESM.pdf/25657646)

**A**

D-HD-iPSCs

F-HD-iPSCs

C1-iPSCs

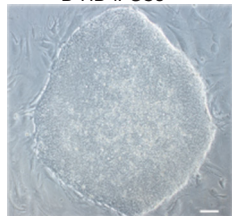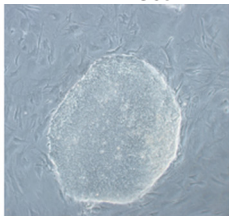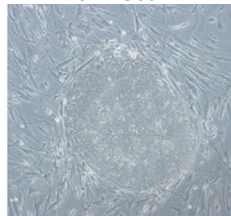**B**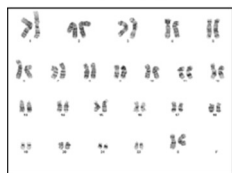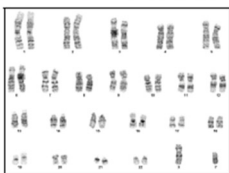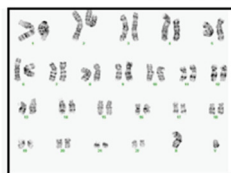**C**

Alkaline Phosphatase

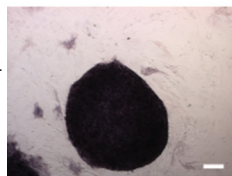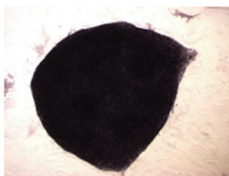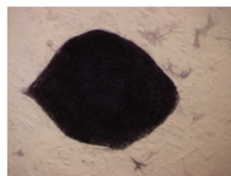**D**

Ectoderm

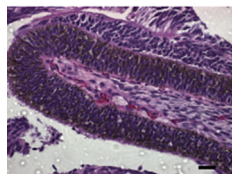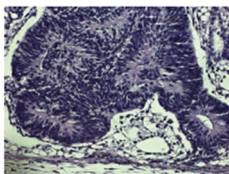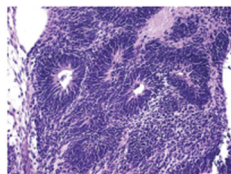

Mesoderm

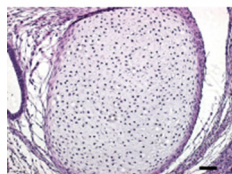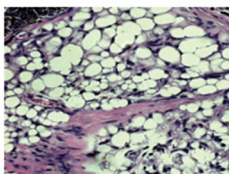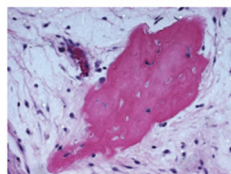

Endoderm

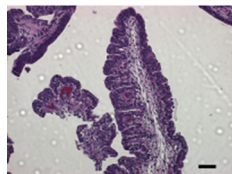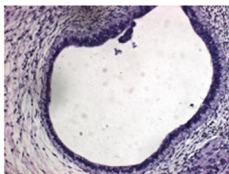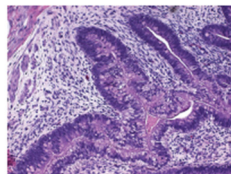

Supplement: MOESM2 [file 25657646]
